# Supplementary material for: Fluoroquinolone-Associated Movement Disorder: A Literature Review
Source: MDPI journal article supplement (doi:10.3390/medicines10060033), 2023-05-25
Supplement: s1 [file s1]

# **Fluoroquinolone-Associated Movement Disorder: A Literature Review**

## **Supplementary Material**

**Supplementary Material S1** – FreeText and MeSH search terms in the US National Library of Medicine

**Supplementary Material S2** – Clinical reports of fluoroquinolone (FQN)-associated movement disorder (MD)

| Supplementary Material S1 – FreeText and MeSH search terms in the US National Library of Medicine |                                                                                                                                                                                                                                                                                                                                                                                                                                                                                                                                                                                                                           |               |           |            |              |              |
|---------------------------------------------------------------------------------------------------|---------------------------------------------------------------------------------------------------------------------------------------------------------------------------------------------------------------------------------------------------------------------------------------------------------------------------------------------------------------------------------------------------------------------------------------------------------------------------------------------------------------------------------------------------------------------------------------------------------------------------|---------------|-----------|------------|--------------|--------------|
| Ciprofloxacin                                                                                     |                                                                                                                                                                                                                                                                                                                                                                                                                                                                                                                                                                                                                           | Ciprofloxacin | Ofloxacin | Pefloxacin | Gatifloxacin | Moxifloxacin |
| Category                                                                                          | Search terms                                                                                                                                                                                                                                                                                                                                                                                                                                                                                                                                                                                                              | Results       |           |            |              |              |
| Parkinsonism                                                                                      | ("ciprofloxacin"[MeSH Terms] OR "ciprofloxacin"[All Fields] OR "ciprofloxacine"[All Fields] OR "ciprofloxacin s"[All Fields] OR "ciprofloxacin s"[All Fields]) AND ("parkinson disease"[MeSH Terms] OR ("parkinson"[All Fields] AND "disease"[All Fields]) OR "parkinson disease"[All Fields] OR "parkinsons"[All Fields] OR "parkinson"[All Fields] OR "parkinson s"[All Fields] OR "parkinsonian disorders"[MeSH Terms] OR ("parkinsonian"[All Fields] AND "disorders"[All Fields]) OR "parkinsonian disorders"[All Fields] OR "parkinsonism"[All Fields] OR "parkinsonisms"[All Fields] OR "parkinsons s"[All Fields]) | 11            | 6         | 0          | 0            | 7            |
| Tics                                                                                              | ("ciprofloxacin"[MeSH Terms] OR "ciprofloxacin"[All Fields] OR "ciprofloxacine"[All Fields] OR "ciprofloxacin s"[All Fields] OR "ciprofloxacin s"[All Fields]) AND ("tics"[MeSH Terms] OR "tics"[All Fields])                                                                                                                                                                                                                                                                                                                                                                                                             | 1             | 0         | 0          | 0            | 0            |
| Dyskinesia                                                                                        | ("ciprofloxacin"[MeSH Terms] OR "ciprofloxacin"[All Fields] OR "ciprofloxacine"[All Fields] OR "ciprofloxacin s"[All Fields] OR "ciprofloxacin s"[All Fields]) AND ("dyskinesiae"[All Fields] OR "dyskinesias"[MeSH Terms] OR "dyskinesias"[All Fields] OR "dyskinesia"[All Fields])                                                                                                                                                                                                                                                                                                                                      | 30            | 11        | 1          | 2            | 3            |
| Dystonia                                                                                          | ("ciprofloxacin"[MeSH Terms] OR "ciprofloxacin"[All Fields] OR "ciprofloxacine"[All Fields] OR "ciprofloxacin s"[All Fields] OR "ciprofloxacin s"[All Fields]) AND ("dystonia"[MeSH Terms] OR "dystonia"[All Fields] OR "dystonias"[All Fields] OR "dystonic disorders"[MeSH Terms] OR "dystonic disorders"[All Fields] AND "disorders"[All Fields])                                                                                                                                                                                                                                                                      | 3             | 1         | 0          | 0            | 1            |
| Stuttering                                                                                        | ("ciprofloxacin"[MeSH Terms] OR "ciprofloxacin"[All Fields] OR "ciprofloxacine"[All Fields] OR "ciprofloxacin s"[All Fields] OR "ciprofloxacin s"[All Fields]) AND ("stammerers"[All Fields] OR "stammers"[All Fields] OR "stutterer"[All Fields] OR "stutterer s"[All Fields] OR "stutterers"[All Fields] OR "stuttering"[MeSH Terms] OR "stuttering"[All Fields] OR "stammer"[All Fields] OR "stammering"[All Fields] OR "stutter"[All Fields] OR "stuttered"[All Fields] OR "stutters"[All Fields] OR "stutterings"[All Fields])                                                                                       | 0             | 0         | 0          | 0            | 0            |
| Myoclonus                                                                                         | ("ciprofloxacin"[MeSH Terms] OR "ciprofloxacin"[All Fields] OR "ciprofloxacine"[All Fields] OR "ciprofloxacin s"[All Fields] OR "ciprofloxacin s"[All Fields]) AND ("myoclonus"[MeSH Terms] OR "myoclonus"[All Fields])                                                                                                                                                                                                                                                                                                                                                                                                   | 10            | 5         | 2          | 1            | 0            |
| Restless legs syndrome                                                                            | ("ciprofloxacin"[MeSH Terms] OR "ciprofloxacin"[All Fields] OR "ciprofloxacine"[All Fields] OR "ciprofloxacin s"[All Fields] OR "ciprofloxacin s"[All Fields]) AND ("restless legs syndrome"[MeSH Terms] OR "restless legs syndrome"[All Fields] AND "legs"[All Fields] AND "syndrome"[All Fields])                                                                                                                                                                                                                                                                                                                       | 0             | 0         | 0          | 0            | 2            |
| Akathisia                                                                                         | ("ciprofloxacin"[MeSH Terms] OR "ciprofloxacin"[All Fields] OR "ciprofloxacine"[All Fields] OR "ciprofloxacin s"[All Fields] OR "ciprofloxacin s"[All Fields]) AND ("akathisia"[All Fields] OR "psychomotor agitation"[MeSH Terms] OR "psychomotor"[All Fields] AND "agitation"[All Fields])                                                                                                                                                                                                                                                                                                                              | 2             | 0         | 0          | 0            | 0            |
| Tremor                                                                                            | ("ciprofloxacin"[MeSH Terms] OR "ciprofloxacin"[All Fields] OR "ciprofloxacine"[All Fields] OR "ciprofloxacin s"[All Fields] OR "ciprofloxacin s"[All Fields]) AND ("tremor"[MeSH Terms] OR "tremor"[All Fields] OR "tremors"[All Fields] OR "tremoring"[All Fields] OR "tremorous"[All Fields])                                                                                                                                                                                                                                                                                                                          | 15            | 11        | 0          | 2            | 4            |
| Chorea                                                                                            | ("ciprofloxacin"[MeSH Terms] OR "ciprofloxacin"[All Fields] OR "ciprofloxacine"[All Fields] OR "ciprofloxacin s"[All Fields] OR "ciprofloxacin s"[All Fields]) AND ("chorea"[MeSH Terms] OR "chorea"[All Fields] OR "choreas"[All Fields])                                                                                                                                                                                                                                                                                                                                                                                | 2             | 4         | 0          | 0            | 1            |
| Restlessness                                                                                      | ("ciprofloxacin"[MeSH Terms] OR "ciprofloxacin"[All Fields] OR "ciprofloxacine"[All Fields] OR "ciprofloxacin s"[All Fields] OR "ciprofloxacin s"[All Fields]) AND ("psychomotor agitation"[MeSH Terms] OR "psychomotor"[All Fields] AND "agitation"[All Fields]) OR "psychomotor agitation"[All Fields] OR "restlessness"[All Fields] OR "restless"[All Fields])                                                                                                                                                                                                                                                         | 8             | 6         | 1          | 0            | 2            |
| Ataxia                                                                                            | ("ciprofloxacin"[MeSH Terms] OR "ciprofloxacin"[All Fields] OR "ciprofloxacine"[All Fields] OR "ciprofloxacin s"[All Fields] OR "ciprofloxacin s"[All Fields]) AND ("ataxia"[MeSH Terms] OR "ataxia"[All Fields] OR "ataxias"[All Fields])                                                                                                                                                                                                                                                                                                                                                                                | 12            | 11        | 0          | 1            | 2            |
| Ballism                                                                                           | ("ciprofloxacin"[MeSH Terms] OR "ciprofloxacin"[All Fields] OR "ciprofloxacine"[All Fields] OR "ciprofloxacin s"[All Fields] OR "ciprofloxacin s"[All Fields]) AND ("dyskinesias"[MeSH Terms] OR "dyskinesias"[All Fields] OR "ballism"[All Fields])                                                                                                                                                                                                                                                                                                                                                                      | 25            | 10        | 1          | 2            | 3            |

|                   |                                                                                                                                                                                                                                                                                                                                             |     |    |   |   |    |    |
|-------------------|---------------------------------------------------------------------------------------------------------------------------------------------------------------------------------------------------------------------------------------------------------------------------------------------------------------------------------------------|-----|----|---|---|----|----|
| Hyperkinetic      | ("ciprofloxacin"[MeSH Terms] OR "ciprofloxacin"[All Fields] OR "ciprofloxacin"[All Fields] OR "ciprofloxacin s"[All Fields] OR "ciprofloxacin s"[All Fields]) AND ("hyperkinetic"[All Fields] OR "hyperkinetics"[All Fields])                                                                                                               | 0   | 1  | 0 | 0 | 0  | 1  |
| Hypokinetic       | ("ciprofloxacin"[MeSH Terms] OR "ciprofloxacin"[All Fields] OR "ciprofloxacin"[All Fields] OR "ciprofloxacin s"[All Fields] OR "ciprofloxacin s"[All Fields]) AND ("hypokinesia"[MeSH Terms] OR "hypokinesia"[All Fields] OR "hypokinetic"[All Fields])                                                                                     | 0   | 1  | 0 | 0 | 0  | 1  |
| Bradykinesia      | ("ciprofloxacin"[MeSH Terms] OR "ciprofloxacin"[All Fields] OR "ciprofloxacin"[All Fields] OR "ciprofloxacin s"[All Fields] OR "ciprofloxacin s"[All Fields]) AND ("hypokinesia"[MeSH Terms] OR "hypokinesia"[All Fields] OR "bradykinesia"[All Fields])                                                                                    | 0   | 1  | 0 | 0 | 0  | 1  |
| Movement disorder | ("ciprofloxacin"[MeSH Terms] OR "ciprofloxacin"[All Fields] OR "ciprofloxacin"[All Fields] OR "ciprofloxacin s"[All Fields] OR "ciprofloxacin s"[All Fields]) AND ("movement disorders"[MeSH Terms] OR "movement disorders"[All Fields] OR "disorders"[All Fields]) OR "movement disorders"[All Fields] OR "movement disorder"[All Fields]) | 15  | 8  | 1 | 0 | 5  | 5  |
| Total             |                                                                                                                                                                                                                                                                                                                                             | 134 | 76 | 6 | 8 | 30 | 53 |

| Supplementary Material S2 – Clinical reports of fluoroquinolone (FQN)-associated movement disorder (MD) |                                                                                                                                                                        |                   |                             |          |                       |                   |                         |                                                                                     |                                       |                                         |           |                                                                                                                    |                                                                          |                             |                                         |                                                                     |
|---------------------------------------------------------------------------------------------------------|------------------------------------------------------------------------------------------------------------------------------------------------------------------------|-------------------|-----------------------------|----------|-----------------------|-------------------|-------------------------|-------------------------------------------------------------------------------------|---------------------------------------|-----------------------------------------|-----------|--------------------------------------------------------------------------------------------------------------------|--------------------------------------------------------------------------|-----------------------------|-----------------------------------------|---------------------------------------------------------------------|
| Author                                                                                                  | Reference                                                                                                                                                              | Country, Year     | Number of patients reported | Age, Sex | FQN                   | FQN dose (mg/day) | FQN indication          | Comorbidities                                                                       | Time from FQN start - MD onset (days) | Time from management to recovery (days) | Follow-up | Important clinical management                                                                                      | Neurological symptoms                                                    | Neuroimaging – CT scan, MRI | EEG, EMG                                | Note                                                                |
| Myoclonus (MCL)                                                                                         |                                                                                                                                                                        |                   |                             |          |                       |                   |                         |                                                                                     |                                       |                                         |           |                                                                                                                    |                                                                          |                             |                                         |                                                                     |
| Schwartz et al [25]                                                                                     | Schwartz MT, Calvert JF. Potential neurologic toxicity related to ciprofloxacin. DICP 1990;24:138-40.                                                                  | USA 1990          | 1                           | 74 F     | Ciprofloxacin         | 1000              | Cellulitis              | Diabetes, ischemic heart disease, peripheral vascular disease, diabetic nephropathy | 12                                    | 2                                       | CR        | Ciprofloxacin discontinuation. Clonazepam was added. The clonazepam was tapered to discontinuation one week later. | Multifocal MCL.                                                          | NA                          | EEG: normal.                            | High dose of ciprofloxacin due to decreased renal function.         |
| Farrington et al [26]                                                                                   | Farrington J, Stoudemire A, Tierney J. The role of ciprofloxacin in a patient with delirium due to multiple etiologies. Gen Hosp Psychiatry 1995;17:47-53.             | USA 1995          | 1                           | 40 F     | Ciprofloxacin         | NA                | Meningitis              | Psychiatry, postoperative cerebrospinal fluid leak                                  | 5                                     | 2                                       | CR        | Ciprofloxacin discontinuation. Lorazepam was added.                                                                | Multifocal MCL. Agitated, disoriented, and visual hallucinations.        | NA                          | NA                                      | Long discussion about fluoroquinolones and neurologic side effects. |
| Bagon et al [29]                                                                                        | Bagon JA. Neuropsychiatric complications following quinolone overdose in renal failure. Nephrol Dial Transplant 1999;14:1337.                                          | Belgium 1999      | 1                           | 81 F     | Ofloxacin, pefloxacin | 200, 400          | Urinary tract infection | Renal insufficiency                                                                 | 5                                     | 7                                       | CR        | Ofloxacin and pefloxacin were discontinued.                                                                        | Multifocal myoclonus. Confusion and diffuse muscle rigidity.             | NA                          | EEG: diffuse non-focalized dysrhythmia. | Combination of two quinolones                                       |
| Marinella et al [33]                                                                                    | Marinella MA. Myoclonus and generalized seizures associated with gatifloxacin treatment. Arch Intern Med 2001;161:2261-2.                                              | USA 2001          | 1                           | 87 F     | Gatifloxacin          | 800               | Urinary tract infection | Alzheimer dementia                                                                  | 1                                     | 1                                       | CR        | Gatifloxacin was discontinued                                                                                      | MCL.                                                                     | CT scan: normal             | EEG: normal.                            | -                                                                   |
| Al-Ghamdi et al [34]                                                                                    | Al-Ghamdi SM. Reversible Encephalopathy and Delirium in Patients with Chronic Renal Failure who had Received ciprofloxacin. Saudi J Kidney Dis Transpl 2002;13:163-70. | Saudi Arabia 2002 | 3                           | 46 M     | Ciprofloxacin         | 500               | Urinary tract infection | -                                                                                   | 2                                     | 6                                       | CR        | Ciprofloxacin was discontinued                                                                                     | Segmental MCL. Drowsiness, disorientation, hyperreflexia, and asterixis. | CT scan: normal             | EEG: triphasic slow waves               | -                                                                   |
|                                                                                                         |                                                                                                                                                                        |                   |                             | 67 F     | Ciprofloxacin         | 400               | Pneumonia               | Diabetes mellitus, hypertension                                                     | 4                                     | 14                                      | CR        | Ciprofloxacin was discontinued                                                                                     | MCL. Drowsiness, disorientation, hyperreflexia, and asterixis.           | CT scan: normal             | EEG: triphasic slow waves               | -                                                                   |
|                                                                                                         |                                                                                                                                                                        |                   |                             | 39 F     | Ciprofloxacin         | 1000              | Urinary tract infection | Hypertension                                                                        | 4                                     | 9                                       | CR        | Ciprofloxacin was discontinued                                                                                     | Segmental MCL. Drowsiness, disorientation, and hyperreflexia.            | CT scan: normal             | NA                                      | -                                                                   |

|                        |                                                                                                                                                                                    |                  |   |      |               |      |                                         |                                                         |    |    |    |                                                                                                                                                         |                                                                                                                                                                             |                                           |                                      |                                                                |
|------------------------|------------------------------------------------------------------------------------------------------------------------------------------------------------------------------------|------------------|---|------|---------------|------|-----------------------------------------|---------------------------------------------------------|----|----|----|---------------------------------------------------------------------------------------------------------------------------------------------------------|-----------------------------------------------------------------------------------------------------------------------------------------------------------------------------|-------------------------------------------|--------------------------------------|----------------------------------------------------------------|
| Post et al [37]        | Post B, Koelman JH, Tijssen MA. Propriospinal myoclonus after treatment with ciprofloxacin. <i>Mov Disord</i> 2004;19:595-7.                                                       | Netherlands 2004 | 1 | 55 M | Ciprofloxacin | 2250 | Urinary tract infection                 |                                                         | 9  | NA | No | After ciprofloxacin discontinuation, the jerks continued for several months                                                                             | Propriospinal MCL. Involuntary truncal jerks, which appeared when lying down on his side and after a few days, mainly when lying on his back                                | MRI: normal                               | EEG: normal.                         | Videotape. Extensive description of electrodiagnostic studies. |
| Cheung et al [39]      | Cheung YF, Wong WW, Tang KW, Chan JH, Li PC. Ciprofloxacin-induced palatal tremor. <i>Mov Disord</i> 2007;22:1038-43.                                                              | China 2007       | 1 | 84 M | Ciprofloxacin | 2000 | Cellulitis                              | Hypertension, gouty arthritis, and minor stroke         | 3  | 2  | CR | Ciprofloxacin was discontinued. Valproate was started.                                                                                                  | Palatal MCL. Jerky movements of the soft palate of variable rhythmicity were observed bilaterally. Involuntary movements of the lower part of the face were present as well | CT and MRI: normal, old lacunar infarcts. | NA                                   | Videotape.                                                     |
| Striano et al [40]     | Striano P, Zara F, Coppola A, Ciampa C, Pezzella M, Striano S. Epileptic myoclonus as ciprofloxacin-associated adverse effect. <i>Mov Disord</i> 2007;22:1675-6.                   | Italy 2007       | 1 | 63 M | Ciprofloxacin | 200  | Urinary tract infection                 | Chronic renal failure, hypertension                     | 2  | 1  | CR | Ciprofloxacin was discontinued. Lorazepam was started. A significant improvement in MCL was observed with lorazepam administration.                     | Multifocal MCL. Sensory stimuli or tendon taps worsened MCL.                                                                                                                | MRI: normal                               | EEG: multifocal paroxysmal activity. | Videotape.                                                     |
| Jayathissa et al [43]  | Jayathissa S, Woolley M, Ganasegaram M, Holden J, Cu E. Myoclonus and delirium associated with ciprofloxacin. <i>Age Ageing</i> 2010;39:762.                                       | New Zealand 2010 | 1 | 85 M | Ciprofloxacin | 1000 | Infected hip joint                      | -                                                       | 7  | 1  | CR | Ciprofloxacin was discontinued. A small dose of clonazepam was started. A ciprofloxacin rechallenge was attempted, and the patient developed MCL again. | Multifocal MCL. Delirium and hallucinations.                                                                                                                                | NA                                        | NA                                   | Rechallenge                                                    |
| Anderson et al [46]    | Anderson RM, Chowdhury N, Ahmed J, Smalligan RD. "CIPROCLONUS": Ciprofloxacin-induced myoclonus. <i>J Investigative Med</i> 2013;61:390.                                           | USA 2013         | 1 | 63 M | Ciprofloxacin | -    | Urinary tract infection                 | Schizophrenia                                           | 2  | 1  | CR | Ciprofloxacin was discontinued.                                                                                                                         | Multifocal MCL.                                                                                                                                                             | CT scan: normal                           | NA                                   | -                                                              |
| Kango Gopal et al [48] | Kango Gopal G, Hewton C, Pazhvoor SK. Myoclonus associated with concomitant ciprofloxacin and oxycodone in an older patient. <i>Br J Clin Pharmacol</i> 2014;77:906-7.             | Australia 2013   | 1 | 80 F | Ciprofloxacin | 1000 | Urinary tract infection                 | Osteoporosis, osteoarthritis, and cognitive impairment. | 7  | 8  | CR | Ciprofloxacin was discontinued.                                                                                                                         | Segmental MCL.                                                                                                                                                              | CT scan: normal                           | NA                                   | -                                                              |
| Juana et al [51]       | Bueno Juana E, Vicente de Vera Floristán C, Gracia Gutiérrez A, Pérez Calvo JL, Tejero Juste C. Myoclonus associated with Ciprofloxacin therapy. <i>Farm Hosp</i> 2016;40:622-623. | Spain 2016       | 1 | 75 M | Ciprofloxacin | -    | Transurethral resection of the prostate | -                                                       | 4  | NA | CR | Ciprofloxacin was discontinued. Clonazepam was started.                                                                                                 | Segmental MCL.                                                                                                                                                              | NA                                        | NA                                   | -                                                              |
| Kalita et al [52]      | Kalita J, Bhoi SK, Betal S, Misra UK. Safety and efficacy of additional levofloxacin in tuberculous meningitis: A randomized controlled pilot study.                               | India 2016       | 2 | NA   | NA            | NA   | NA                                      | NA                                                      | NA | NA | NA | NA                                                                                                                                                      | NA                                                                                                                                                                          | NA                                        | NA                                   | Assessment of levofloxacin therapy for tuberculous meningitis. |



|                        |                                                                                                                                                                                                                                                                                        |              |   |      |               |      |                                   |                                                                                                                        |    |    |    |                                                                            |                                                                                                                    |                             |             |                               |
|------------------------|----------------------------------------------------------------------------------------------------------------------------------------------------------------------------------------------------------------------------------------------------------------------------------------|--------------|---|------|---------------|------|-----------------------------------|------------------------------------------------------------------------------------------------------------------------|----|----|----|----------------------------------------------------------------------------|--------------------------------------------------------------------------------------------------------------------|-----------------------------|-------------|-------------------------------|
| Pastor et al[27]       | Pastor P, Moitinho E, Elizalde I, Cirera I, Tolosa E. Reversible oral-facial dyskinesia in a patient receiving ciprofloxacin hydrochloride. J Neurol 1996;243:616-7.                                                                                                                   | Spain 1996   | 1 | 68 M | Ciprofloxacin | 1000 | Urinary tract infection           | Hepatitis C virus infection                                                                                            | 5  | 1  | CR | Ciprofloxacin was discontinued.                                            | Orofacial DKN. Facial grimacing and distortions, puckering and pursing of the lips, without involving the eyelids. | NA                          | NA          |                               |
| Yasuda et al[30]       | Yasuda H, Yoshida A, Masuda Y, Fukayama M, Kita Y, Inamatsu T. Levofloxacin-induced neurological adverse effects such as convulsion, involuntary movement (tremor, myoclonus and chorea like), visual hallucination in two elderly patients. Nihon Ronen Igakkai Zasshi 1999;36:213-7. | Japan 1999   | 2 | 67 M | Levofloxacin  | 300  | Upper respiratory infection       | Alcoholism                                                                                                             | 4  | 7  | CR | Levofloxacin was discontinued.                                             | Chorea. Gait disturbance and visual hallucinations.                                                                | NA                          | NA          | Serum levofloxacin 3.6ug/ml.  |
|                        |                                                                                                                                                                                                                                                                                        |              |   | 85 M | Levofloxacin  | 200  | Chronic bronchitis                | -                                                                                                                      | 68 | 14 | CR | Levofloxacin was discontinued.                                             | Chorea. Gait disturbance and dysarthria.                                                                           | NA                          | NA          | Serum levofloxacin 2.55ug/ml. |
| Lee et al [31]         | Lee CH, Cheung RT, Chan TM. Ciprofloxacin-induced oral facial dyskinesia in a patient with normal liver and renal function. Hosp Med 2000;61:142-3.                                                                                                                                    | China 2000   | 1 | 49 F | Ciprofloxacin | 400  | Urinary tract infection           | -                                                                                                                      | 2  | NA | CR | Ciprofloxacin was changed to netromycin. Clonazepam was started.           | Orofacial DKN. Involuntary facial grimacing occurred intermittently every 4-6 hours.                               | CT and MRI: normal.         | EEG: normal | -                             |
| MacLeod et al [32]     | MacLeod W. Case report: severe neurologic reaction to ciprofloxacin. Can Fam Physician 2001;47:553-5.                                                                                                                                                                                  | Canada 2000  | 1 | 69 F | Ciprofloxacin | 800  | Urinary tract infection           | -                                                                                                                      | 1  | 1  | CR | Ciprofloxacin was discontinued.                                            | Orofacial DKN. Facial grimacing, tics, protruding tongue, echolalia, and echopraxia.                               | CT scan: normal             | NA          | Single-dose                   |
| De Bleecker et al [36] | De Bleecker JL, Vervaeet VL, De Sarro A. Reversible orofacial dyskinesia after ofloxacin treatment. Mov Disord 2004;19:731-2.                                                                                                                                                          | Belgium 2004 | 1 | 43 M | Ofloxacin     | 400  | Upper respiratory infection       | Depression, traumatic foot amputation                                                                                  | 3  | 1  | CR | Ofloxacin was discontinued. Biperiden IM was given.                        | Orofacial DKN. Facial grimacing movements and inability to close the jaw.                                          | NA                          | NA          | -                             |
| Azar et al [38]        | Azar S, Ramjani A, Van Gerpen JA. Ciprofloxacin-induced chorea. Mov Disord 2005;20:513-514.                                                                                                                                                                                            | USA 2005     | 1 | 43 F | Ciprofloxacin | NA   | Insect bite                       | -                                                                                                                      | NA | 5  | CR | Ciprofloxacin was discontinued.                                            | Orofacial and distal choreiform movements. Subacute confusional state.                                             | NA                          | NA          | -                             |
| Kim et al [41]         | Kim SH, Jeong SH, Kim JW, Lee SH, Kim JM. A case of hemiballism as a rare side effect of ciprofloxacin in a patient with liver cirrhosis. Chemotherapy 2009;55:207-10.                                                                                                                 | Korea 2008   | 1 | 59 F | Ciprofloxacin | 1000 | Kidney abscess                    | Cirrhosis                                                                                                              | 20 | 6  | CR | Ciprofloxacin was discontinued.                                            | Hemichorea. Altered mental status.                                                                                 | MRI: normal                 | NA          | -                             |
| Mittal et al [44]      | Mittal SO, Machado DG, Jabbari B. Orofacial dyskinesia after moxifloxacin treatment--a case with normal hepatorenal function and review of literature. Clin Neuropharmacol 2012;35:292-4.                                                                                              | USA 2012     | 1 | 58 F | Moxifloxacin  | 400  | Acute bronchitis                  | -                                                                                                                      | 3  | 56 | CR | Ciprofloxacin was discontinued. Clonidine was started.                     | Orofacial DKN. Involuntary choreic, dystonic movements involving the tongue, lips, jaw, and facial muscles.        | MRI: normal                 | NA          | -                             |
| Abdalla et al [45]     | Abdalla A, Ramly S, Boers P, Casserly L. Ciprofloxacin-associated choreoathetosis in a haemodialysis patient. BMJ Case Rep. 2013 Apr 18;2013:bcr2013009293. doi: 10.1136/bcr-2013-009293. PMID: 23605987; PMCID: PMC3645130.                                                           | Ireland 2013 | 1 | 72 M | Ciprofloxacin | 1000 | Lower respiratory tract infection | End-stage kidney disease, type 2 diabetes mellitus, transient ischaemic attack, hypertension, and hypercholesterolemia | NA | 6  | CR | Ciprofloxacin and esomeprazole were discontinued. Risperidone was started. | Generalized chorea. Restless and generalized choreoathetosis affected his upper and lower limbs, face, and tongue. | CT scan: normal, unchanged. | NA          | -                             |

|                         |                                                                                                                                                                                                               |             |   |      |               |      |                                       |                                            |   |    |    |                                                                                       |                                                                                                                                                           |                         |             |                                     |
|-------------------------|---------------------------------------------------------------------------------------------------------------------------------------------------------------------------------------------------------------|-------------|---|------|---------------|------|---------------------------------------|--------------------------------------------|---|----|----|---------------------------------------------------------------------------------------|-----------------------------------------------------------------------------------------------------------------------------------------------------------|-------------------------|-------------|-------------------------------------|
| Host et al [47]         | Host BD, Sloan W. Orofacial dyskinesia associated with the use of levofloxacin. Ann Pharmacother 2014;48:142-4.                                                                                               | USA 2013    | 1 | 77 F | Levofloxacin  | 1500 | Acute diverticulitis                  | Mild renal insufficiency                   | 4 | 1  | CR | Levofloxacin was discontinued. Diphenhydramine and lorazepam were started.            | Orofacial DKN. Involuntary, rhythmic facial grimacing accompanied by periodic cervical muscular contractions.                                             | NA                      | NA          | -                                   |
| Bacchin et al [57]      | Bacchin R, Macchione F, Cardellini D, Orlandi R, Gajofatto A, Zanusso G, Vattemi G. Levofloxacin-induced hemichorea-hemiballism in a patient with previous thalamic infarction. Neurol Sci 2018;39:1483-1485. | Italy 2018  | 1 | 80 M | Levofloxacin  | 1500 | Chronic obstructive pulmonary disease | -                                          | 2 | 10 | CR | Levofloxacin was unchanged for five days. Tetrabenazine and clonazepam were started.  | Hemichorea and ballism. Hemichoreic syndrome with superimposed ballistic movements.                                                                       | CT scan and MRI: normal | NA          | -                                   |
| Sugiura et al [64]      | Sugiura M, Shibata K, Saito S, Nishimura Y, Sakura H. Levofloxacin-associated Encephalopathy with Severe Hyperventilation. Intern Med 2019;58:1495-1499.                                                      | Japan 2019  | 1 | 64 F | Levofloxacin  | 500  | Urinary tract infection               | -                                          | 1 | 17 | CR | Levofloxacin was discontinued.                                                        | DKN. Upper and lower limbs and involuntary movements.                                                                                                     | CT scan: normal         | EEG: normal | -                                   |
| <b>Dystonia (DTN)</b>   |                                                                                                                                                                                                               |             |   |      |               |      |                                       |                                            |   |    |    |                                                                                       |                                                                                                                                                           |                         |             |                                     |
| Sharma et al [42]       | Sharma DD, Aggarwal A, Sharma RC, Kumar R. A probable association of acute dystonia with gemifloxacin administration. Indian J Med Sci 2009;63:557-60.                                                        | India 2009  | 1 | 36 F | Gemifloxacin  | 320  | Upper respiratory infection           | -                                          | 3 | 1  | CR | Gemifloxacin was discontinued. Promethazine was started.                              | Generalized DTN. Restlessness was noted.                                                                                                                  | CT scan: normal         | EEG: normal | -                                   |
| Lizarraga et al [49]    | Lizarraga KJ, Lopez MR, Singer C. Reversible craniocervical dystonia associated with levofloxacin. J Clin Mov Disord 2015;2:10.                                                                               | USA 2015    | 1 | 62 M | Levofloxacin  | 1000 | Urinary tract infection               | Diabetes mellitus, end-stage renal disease | 3 | 7  | CR | Levofloxacin was discontinued.                                                        | Oromandibular and cervical DTN. Involuntary blinking, blepharospasm, tongue tremor and protrusion, dysarthria, platysmata contractions, and anterocollis. | NA                      | NA          | Videotape                           |
| Ridout et al [50]       | Ridout KK, Ridout SJ, Pirnie LF, Puttichanda SP. Sudden-onset dystonia in a patient taking asenapine: interaction between ciprofloxacin and asenapine metabolism. Am J Psychiatry 2015;172:1162-3.            | USA 2015    | 1 | 44 F | Ciprofloxacin | 1000 | Urinary tract infection               | Bipolar I disorder                         | 2 | 1  | CR | Ciprofloxacin was changed to nitrofurantoin. Diphenhydramine was started.             | Oromandibular DTN.                                                                                                                                        | NA                      | NA          | Possible interaction ith asenapine. |
| Philips et al [61]      | Philips CA, Augustine P. Levofloxacin associated fatal oro-facio-brachial dystonia in cirrhosis. OGH Reports 2018;7:41-2.                                                                                     | India 2018  | 1 | 58 M | Levofloxacin  | -    | Community-acquired pneumonia          | Cirrhosis                                  | 1 | NA | No | Levofloxacin was discontinued. Lorazepam was started. The patient died due to sepsis. | Oromandibular DTN.                                                                                                                                        | NA                      | NA          | Death                               |
| Shihabudheen et al [62] | Shihabudheen P, Uvais NA. Multifocal dystonia induced by levofloxacin. Asian J Pharm and Pharmacol 2018;4:87-9.                                                                                               | India 2018  | 1 | 45 M | Levofloxacin  | 500  | Multiple cutaneous abscesses          | Diabetes mellitus                          | 1 | 2  | CR | Levofloxacin was discontinued.                                                        | Generalized DTN. Speech stuttering, neck flexion on attempted oral communication, and DTN movements of both upper and lower limbs.                        | NA                      | NA          | -                                   |
| Yildiz M.Ç. et al [65]  | Yildiz, M.Ç.; Arslan, M.; Gökçenoğlu, Y.; Çalıřkan, A.M.; Çalıřkan, S.; Eren, İ. Dystonia as an unexpected interaction                                                                                        | Turkey 2019 | 1 | 55 M | Ciprofloxacin | 1000 | Urinary tract infection               |                                            | 3 | NA | CR | Ciprofloxacin was discontinued.                                                       | DTN.                                                                                                                                                      | NA                      | NA          | -                                   |

[illegible]
